# Supplementary material for: Prunus mume extract promoted biofilm formation of Lactiplantibacillus plantarum JB1 to improve acid and oxidative stress resistance
Source: Royal Society of Chemistry journal article supplement (doi:10.1039/d5fb00241a), 2025-09-29

**Supplement Fig. 1.**

Survival rate (A) and biofilm formation index (B) of *L. plantarum* JB-1 under acid stress, oxidative stress, and bile salt stress after 0 and 10 mg/mL PME pre-stress respectively

Note: Lowercase letters indicate significant differences ( $p < 0.05$ ) between PME-0 and PME-10 under the same stress and stress time. Capital letters represent PME-0 or PME-10, and there is a significant difference ( $p < 0.05$ ) between different stress times under the same stress

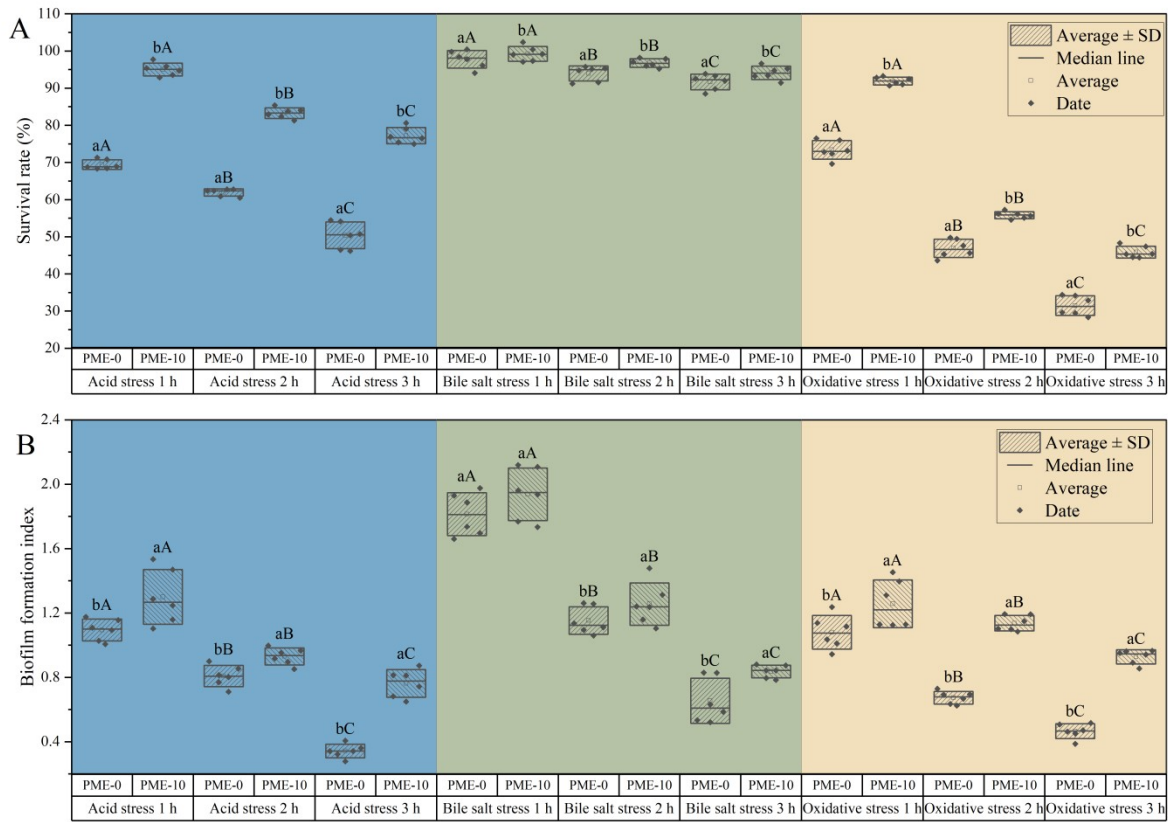

Supplement: d5fb00241a1.pdf [file d5fb00241a1.pdf]
